# Supplementary material for: Estimates of prevalence, time-trend, and association of smoking in adults living with HIV, HBV, and HCV (NHANES 1999–2018)
Source: Springer Nature journal article supplement (doi:10.1038/s41598-022-24291-6), 2022-11-19
Supplement: 41598_2022_24291_MOESM1_ESM.pdf [file 41598_2022_24291_MOESM1_ESM.pdf]

**Full Title:** Estimates of Prevalence, Time-Trend, and Association of Smoking in Adults Living with HIV, HBV, and HCV (NHANES 1999–2018)

**Authors:** Jie Yang<sup>1,#</sup>, Jin-Long Lin<sup>2,3,#</sup>, Jing Liu<sup>4,#</sup>, Xiao-Wen Jiang<sup>5</sup>, Hao Zhang<sup>6</sup>, Lei Peng<sup>7,\*</sup>

1 Public Health Clinical Center of Chengdu, Chengdu 610066, China; [yangjieHJ@gmail.com](mailto:yangjieHJ@gmail.com)

2 School of Marxism, Tsinghua University, Beijing 100084, China; [jllin@pku.edu.cn](mailto:jllin@pku.edu.cn)

3 Institute of Population Research, Peking University, Beijing 100871, China; [jllin@pku.edu.cn](mailto:jllin@pku.edu.cn)

4 People Liberation Army Haidian District 17th Retired Cadres Rest Home, Beijing 100143, China; [musihuangwu131@163.com](mailto:musihuangwu131@163.com)

5 Department of Epidemiology, School of Clinical Oncology, Peking University, Beijing 100142, China; [jxw1911110605@pku.edu.cn](mailto:jxw1911110605@pku.edu.cn)

6 Department of Social Medicine and Health Education, School of Public Health, Peking University, Beijing 100191, China; [2011210118@stu.pku.edu.cn](mailto:2011210118@stu.pku.edu.cn)

7 Department of Epidemiology, School of Clinical Oncology, Peking University, Beijing 100142, China

# These authors contributed equally to this work.

\* Correspondence: [2011210593@stu.pku.edu.cn](mailto:2011210593@stu.pku.edu.cn); Tel.: +86-138-0828-2849

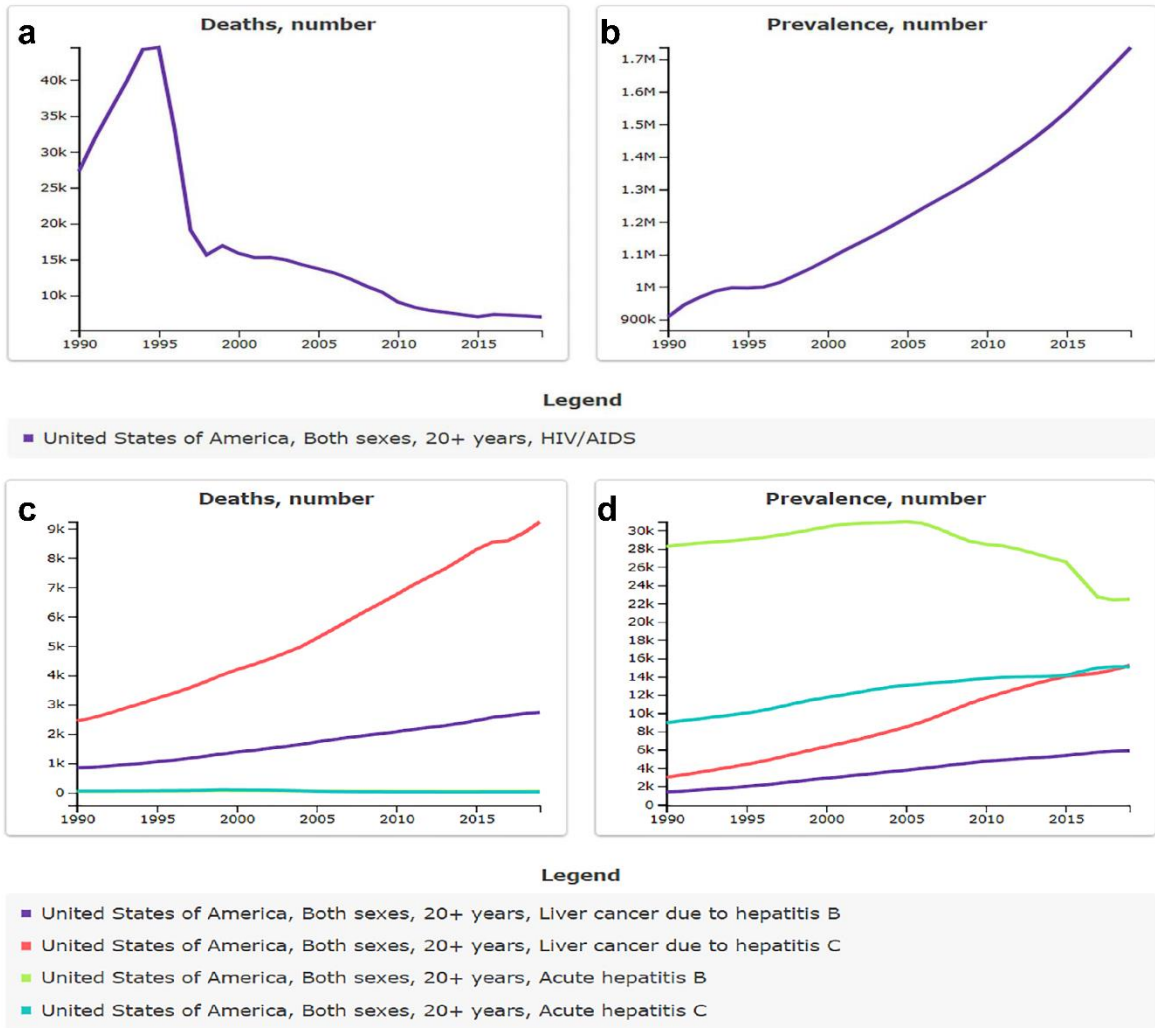

**Supplementary figure S1.** Analysis on the change trend of HIV, HBV, HCV, and liver cancer deaths and prevalence among US 20+ years adults from 1990 to 2019

a. the deaths of HIV/AIDS; b. the prevalence of HIV/AIDS; c. the deaths of liver cancer, HBV and HCV; d. the prevalence of liver cancer, HBV, and HCV.
