# Supplementary material for: Estimates of prevalence, time-trend, and association of smoking in adults living with HIV, HBV, and HCV (NHANES 1999–2018)
Source: Springer Nature journal article supplement (doi:10.1038/s41598-022-24291-6), 2022-11-19
Supplement: 41598_2022_24291_MOESM2_ESM.pdf [file 41598_2022_24291_MOESM2_ESM.pdf]

**Full Title:** Estimates of Prevalence, Time-Trend, and Association of Smoking in Adults Living with HIV, HBV, and HCV (NHANES 1999–2018)

**Authors:** Jie Yang<sup>1,#</sup>, Jin-Long Lin<sup>2,3,#</sup>, Jing Liu<sup>4,#</sup>, Xiao-Wen Jiang<sup>5</sup>, Hao Zhang<sup>6</sup>, Lei Peng<sup>7,\*</sup>

1 Public Health Clinical Center of Chengdu, Chengdu 610066, China; [yangjieHJ@gmail.com](mailto:yangjieHJ@gmail.com)

2 School of Marxism, Tsinghua University, Beijing 100084, China; [jllin@pku.edu.cn](mailto:jllin@pku.edu.cn)

3 Institute of Population Research, Peking University, Beijing 100871, China; [jllin@pku.edu.cn](mailto:jllin@pku.edu.cn)

4 People Liberation Army Haidian District 17th Retired Cadres Rest Home, Beijing 100143, China; [musihuangwu131@163.com](mailto:musihuangwu131@163.com)

5 Department of Epidemiology, School of Clinical Oncology, Peking University, Beijing 100142, China; [jxw1911110605@pku.edu.cn](mailto:jxw1911110605@pku.edu.cn)

6 Department of Social Medicine and Health Education, School of Public Health, Peking University, Beijing 100191, China; [2011210118@stu.pku.edu.cn](mailto:2011210118@stu.pku.edu.cn)

7 Department of Epidemiology, School of Clinical Oncology, Peking University, Beijing 100142, China

# These authors contributed equally to this work.

\* Correspondence: [2011210593@stu.pku.edu.cn](mailto:2011210593@stu.pku.edu.cn); Tel.: +86-138-0828-2849

**Supplementary Table S1.** Demographic characteristics, psychological status, substance use, and smoking profile among people living with HIV|HBV|HCV who are current smokers compared to people without HIV&HBV&HCV (NHANES 1999–2018)

| Characteristics      | People with HIV<br>(n=170) |      | People with HBV<br>(n=184) |      | People with HCV<br>(n=435) |      | People with<br>HIV HBV HCV<br>(n=775) |      | People without<br>HIV&HBV&HCV<br>(n=31,340) |      | Effect size | P value <sup>†</sup> |
|----------------------|----------------------------|------|----------------------------|------|----------------------------|------|---------------------------------------|------|---------------------------------------------|------|-------------|----------------------|
|                      | N                          | %    | N                          | %    | N                          | %    | N                                     | %    | N                                           | %    |             |                      |
| Age (years)          |                            |      |                            |      |                            |      |                                       |      |                                             |      | 0.084       | <0.001               |
| 20–29                | 28                         | 16.5 | 27                         | 14.7 | 15                         | 3.4  | 68                                    | 8.8  | 7,742                                       | 24.7 |             |                      |
| 30–39                | 47                         | 27.6 | 43                         | 23.4 | 54                         | 12.4 | 142                                   | 18.2 | 8,319                                       | 26.5 |             |                      |
| 40–49                | 57                         | 33.5 | 55                         | 29.9 | 159                        | 36.6 | 267                                   | 34.5 | 8,164                                       | 26.1 |             |                      |
| 50–59                | 38                         | 22.4 | 59                         | 32.1 | 207                        | 47.6 | 298                                   | 38.5 | 7,115                                       | 22.7 |             |                      |
| Gender               |                            |      |                            |      |                            |      |                                       |      |                                             |      | 0.053       | <0.001               |
| Male                 | 125                        | 73.5 | 122                        | 66.3 | 274                        | 63.0 | 508                                   | 65.5 | 14,696                                      | 46.9 |             |                      |
| Female               | 45                         | 26.5 | 62                         | 33.7 | 161                        | 37.0 | 267                                   | 34.5 | 16,644                                      | 53.1 |             |                      |
| Race/Ethnicity       |                            |      |                            |      |                            |      |                                       |      |                                             |      | 0.046       | <0.001               |
| Hispanic             | 26                         | 15.2 | 8                          | 4.3  | 78                         | 17.9 | 110                                   | 14.2 | 8,781                                       | 28.0 |             |                      |
| Non-Hispanic White   | 29                         | 17.1 | 15                         | 8.2  | 210                        | 48.3 | 250                                   | 32.3 | 12,876                                      | 41.1 |             |                      |
| Non-Hispanic Black   | 112                        | 65.9 | 57                         | 31.0 | 126                        | 29.0 | 287                                   | 37.0 | 6,440                                       | 20.5 |             |                      |
| Other Race           | 3                          | 1.8  | 104                        | 56.5 | 21                         | 4.8  | 128                                   | 16.5 | 3,243                                       | 10.3 |             |                      |
| Education            |                            |      |                            |      |                            |      |                                       |      |                                             |      | 0.045       | <0.001               |
| High school or less  | 83                         | 48.8 | 87                         | 47.3 | 285                        | 65.5 | 447                                   | 57.7 | 14,332                                      | 45.7 |             |                      |
| Some college or more | 87                         | 51.2 | 97                         | 52.7 | 150                        | 34.5 | 328                                   | 42.3 | 17,008                                      | 54.3 |             |                      |
| Marital status       |                            |      |                            |      |                            |      |                                       |      |                                             |      | 0.050       | <0.001               |

|                                           |     |      |     |      |     |      |     |      |        |      |       |        |
|-------------------------------------------|-----|------|-----|------|-----|------|-----|------|--------|------|-------|--------|
| Married/Living with partner               | 63  | 37.1 | 115 | 62.5 | 218 | 50.1 | 389 | 50.2 | 19,582 | 62.5 |       |        |
| Divorced/Widowed/Separated                | 27  | 15.9 | 31  | 16.8 | 130 | 29.9 | 186 | 24.0 | 4,522  | 14.4 |       |        |
| Never married                             | 80  | 47.0 | 38  | 20.7 | 87  | 20.0 | 200 | 25.8 | 7,236  | 23.1 |       |        |
| Family poverty index ratio (PIR)          |     |      |     |      |     |      |     |      |        |      | 0.062 | <0.001 |
| <Poverty level (PIR<1)                    | 56  | 32.9 | 39  | 21.2 | 173 | 39.8 | 262 | 33.8 | 6,115  | 19.5 |       |        |
| ≥Poverty level (PIR≥1)                    | 114 | 67.1 | 145 | 78.8 | 262 | 60.2 | 513 | 66.2 | 25,225 | 80.5 |       |        |
| Employment                                |     |      |     |      |     |      |     |      |        |      | 0.055 | <0.001 |
| Yes                                       | 62  | 36.5 | 119 | 64.7 | 144 | 33.1 | 322 | 41.5 | 17,989 | 57.4 |       |        |
| No                                        | 108 | 63.5 | 65  | 35.3 | 291 | 66.9 | 453 | 58.3 | 13,351 | 42.6 |       |        |
| Health care insurance                     |     |      |     |      |     |      |     |      |        |      | 0.048 | <0.001 |
| Yes                                       | 68  | 40.0 | 105 | 57.1 | 148 | 34.0 | 317 | 40.9 | 17,197 | 54.9 |       |        |
| No                                        | 102 | 60.0 | 79  | 42.9 | 287 | 66.0 | 458 | 59.1 | 14,143 | 45.1 |       |        |
| Have been heavy alcohol user <sup>a</sup> |     |      |     |      |     |      |     |      |        |      | 0.027 | 0.003  |
| Yes                                       | 17  | 10.0 | 10  | 5.4  | 98  | 22.5 | 123 | 15.9 | 3,874  | 12.4 |       |        |
| No                                        | 153 | 90.0 | 174 | 94.6 | 337 | 77.5 | 652 | 84.1 | 27,466 | 87.6 |       |        |
| Have depression <sup>b</sup>              |     |      |     |      |     |      |     |      |        |      | 0.066 | <0.001 |
| Score 1–4 Minimal depression              | 38  | 38.4 | 44  | 57.9 | 107 | 40.8 | 186 | 43.3 | 8,681  | 54.0 |       |        |
| Score 5–9 Mild depression                 | 31  | 31.3 | 14  | 18.4 | 73  | 27.9 | 116 | 27.0 | 3,307  | 20.6 |       |        |
| Score 10–14 Moderate depression           | 11  | 11.1 | 5   | 6.6  | 36  | 13.7 | 51  | 11.9 | 1,280  | 8.0  |       |        |
| Score 15–19 Moderately severe             | 6   | 6.1  | 3   | 3.9  | 31  | 11.8 | 40  | 9.3  | 585    | 3.6  |       |        |
| Score 20–27 Severe depression             | 13  | 13.1 | 10  | 13.2 | 15  | 5.7  | 37  | 8.5  | 2,214  | 13.8 |       |        |
| Used marijuana or hashish                 |     |      |     |      |     |      |     |      |        |      | 0.093 | <0.001 |
| Yes                                       | 77  | 68.8 | 46  | 40.4 | 305 | 86.6 | 420 | 73.9 | 10,727 | 53.0 |       |        |

|                                         |     |                |     |                |     |                |     |                |        |                |       |        |
|-----------------------------------------|-----|----------------|-----|----------------|-----|----------------|-----|----------------|--------|----------------|-------|--------|
| No                                      | 35  | 31.2           | 68  | 59.6           | 47  | 13.4           | 148 | 26.1           | 9,509  | 47.0           |       |        |
| Used cocaine                            |     |                |     |                |     |                |     |                |        |                | 0.012 | 0.860  |
| Yes                                     | 40  | 95.2           | 14  | 100.0          | 228 | 95.8           | 279 | 95.5           | 3,458  | 95.7           |       |        |
| No                                      | 2   | 4.8            | 0   | 0.0            | 10  | 4.2            | 12  | 4.1            | 157    | 4.3            |       |        |
| Used heroin                             |     |                |     |                |     |                |     |                |        |                | 0.237 | <0.001 |
| Yes                                     | 7   | 16.7           | 2   | 14.3           | 117 | 49.0           | 126 | 43.2           | 395    | 10.9           |       |        |
| No                                      | 35  | 83.3           | 12  | 85.7           | 122 | 51.0           | 166 | 56.8           | 3,218  | 89.1           |       |        |
| Used methamphetamine                    |     |                |     |                |     |                |     |                |        |                | 0.069 | <0.001 |
| Yes                                     | 18  | 42.9           | 6   | 42.9           | 129 | 53.8           | 153 | 52.2           | 1,374  | 38.0           |       |        |
| No                                      | 24  | 57.1           | 8   | 57.1           | 111 | 46.3           | 140 | 47.8           | 2,239  | 62.0           |       |        |
| Used a needle to inject illegal drug    |     |                |     |                |     |                |     |                |        |                | 0.326 | <0.001 |
| Yes                                     | 6   | 5.4            | 5   | 4.3            | 163 | 46.8           | 172 | 30.4           | 325    | 1.6            |       |        |
| No                                      | 106 | 94.6           | 110 | 95.7           | 185 | 53.2           | 393 | 69.6           | 19,939 | 98.4           |       |        |
| Smoking                                 |     |                |     |                |     |                |     |                |        |                | 0.149 | <0.001 |
| Yes                                     | 101 | 59.4           | 75  | 40.8           | 375 | 86.2           | 542 | 69.9           | 13,241 | 42.2           |       |        |
| No                                      | 69  | 40.6           | 109 | 59.2           | 60  | 13.8           | 233 | 30.1           | 18,099 | 57.8           |       |        |
|                                         |     | <b>Mean±SD</b> |     | <b>Mean±SD</b> |     | <b>Mean±SD</b> |     | <b>Mean±SD</b> |        | <b>Mean±SD</b> |       |        |
| Age of first using marijuana or hashish | 77  | 18.1±5.7       | 46  | 18.8±5.3       | 305 | 15.4±4.0       | 420 | 16.2±4.6       | 10,718 | 17.4±4.5       | 0.004 | 0.676  |
| Age of first using cocaine              | 40  | 23.8±6.5       | 14  | 25.0±7.2       | 228 | 22.3±6.6       | 279 | 22.7±6.6       | 3,455  | 21.7±5.7       | 0.001 | <0.001 |
| Age of first using heroin               | 7   | 30.0±10.7      | 2   | 26.0±4.2       | 115 | 23.5±8.0       | 124 | 23.9±8.2       | 394    | 24.0±7.7       | 0.001 | 0.514  |
| Age of first using methamphetamine      | 18  | 26.2±10.8      | 6   | 33.2±10.6      | 129 | 23.8±8.5       | 153 | 24.4±9.0       | 1,373  | 22.2±6.7       | 0.008 | <0.001 |
| Age of first using cigarettes           | 101 | 17.8±4.9       | 75  | 19.2±5.5       | 375 | 16.6±6.0       | 542 | 17.2±5.8       | 13,241 | 17.8±4.7       | 0.001 | <0.001 |

<sup>†</sup> Based on chi-square test or *t* test between people with HIV|HBV|HCV and those without; <sup>a</sup> 5<sup>+</sup> (males) or 4<sup>+</sup> (females) drink/day, every day, at any point in the

past; <sup>b</sup> Based on the Patients Health Questionnaire (PHQ-9); N, sample size; SD, standard deviation.

**Supplementary Table S2.** Multivariable Logistic Regression Analysis (NHANES 1999–2018)

|                             | People living with HIV who are current smokers compared to people who are not smokers |              | People living with HBV who are current smokers compared to people who are not smokers |             | People living with HCV who are current smokers compared to people who are not smokers |              | People living with HIV HBV HCV who are current smokers compared to people who are not smokers |              |
|-----------------------------|---------------------------------------------------------------------------------------|--------------|---------------------------------------------------------------------------------------|-------------|---------------------------------------------------------------------------------------|--------------|-----------------------------------------------------------------------------------------------|--------------|
|                             | OR                                                                                    | 95% CI       | OR                                                                                    | 95% CI      | OR                                                                                    | 95% CI       | OR                                                                                            | 95% CI       |
| Age (years)                 |                                                                                       |              |                                                                                       |             |                                                                                       |              |                                                                                               |              |
| 20–29                       | 1.00                                                                                  | —            | 1.00                                                                                  | —           | 1.00                                                                                  | —            | 1.00                                                                                          | —            |
| 30–39                       | 7.80**                                                                                | (2.98–20.39) | 2.96                                                                                  | (0.95–9.27) | 16.19**                                                                               | (7.96–32.91) | 9.92**                                                                                        | (6.07–16.21) |
| 40–49                       | 2.64                                                                                  | (1.27–5.50)  | 2.82                                                                                  | (0.99–7.93) | 3.74**                                                                                | (2.49–5.59)  | 3.51**                                                                                        | (2.49–4.94)  |
| 50–59                       | 1.53                                                                                  | (0.76–3.01)  | 2.42                                                                                  | (0.83–7.08) | 1.30                                                                                  | (0.95–1.76)  | 1.36                                                                                          | (1.04–1.79)  |
| Gender                      |                                                                                       |              |                                                                                       |             |                                                                                       |              |                                                                                               |              |
| Female                      | 1.00                                                                                  | —            | 1.00                                                                                  | —           | 1.00                                                                                  | —            | 1.00                                                                                          | —            |
| Male                        | 6.93**                                                                                | (3.33–14.44) | 2.72                                                                                  | (1.17–6.32) | 1.47*                                                                                 | (1.11–1.96)  | 1.99**                                                                                        | (1.54–2.55)  |
| Race/Ethnicity              |                                                                                       |              |                                                                                       |             |                                                                                       |              |                                                                                               |              |
| Other Race                  | 1.00                                                                                  | —            | 1.00                                                                                  | —           | 1.00                                                                                  | —            | 1.00                                                                                          | —            |
| Hispanic                    | 1.57                                                                                  | (0.63–3.93)  | 1.18                                                                                  | (0.29–4.87) | 0.86                                                                                  | (0.59–1.25)  | 0.90                                                                                          | (0.64–1.26)  |
| Non-Hispanic White          | 0.30*                                                                                 | (0.14–0.68)  | 0.80                                                                                  | (0.17–3.68) | 0.84                                                                                  | (0.55–1.29)  | 0.64*                                                                                         | (0.45–0.93)  |
| Non-Hispanic Black          | 1.80                                                                                  | (0.38–8.65)  | 0.09**                                                                                | (0.03–0.33) | 1.25                                                                                  | (0.62–2.49)  | 0.61*                                                                                         | (0.38–0.99)  |
| Education                   |                                                                                       |              |                                                                                       |             |                                                                                       |              |                                                                                               |              |
| Some college or more        | 1.00                                                                                  | —            | 1.00                                                                                  | —           | 1.00                                                                                  | —            | 1.00                                                                                          | —            |
| High school or less         | 1.23                                                                                  | (0.70–2.16)  | 1.55                                                                                  | (0.64–3.75) | 2.48**                                                                                | (1.83–3.36)  | 1.78**                                                                                        | (1.39–2.29)  |
| Marital status              |                                                                                       |              |                                                                                       |             |                                                                                       |              |                                                                                               |              |
| Married/Living with partner | 1.00                                                                                  | —            | 1.00                                                                                  | —           | 1.00                                                                                  | —            | 1.00                                                                                          | —            |

|                                           |       |             |       |              |         |              |        |              |
|-------------------------------------------|-------|-------------|-------|--------------|---------|--------------|--------|--------------|
| Divorced/Widowed/Separated                | 1.60  | (0.66–3.85) | 1.21  | (0.38–3.87)  | 0.73    | (0.53–1.00)  | 0.81   | (0.61–1.08)  |
| Never married                             | 0.44* | (0.24–0.81) | 0.83  | (0.32–2.15)  | 0.92    | (0.63–1.35)  | 0.75   | (0.55–1.02)  |
| Family poverty index ratio (PIR)          |       |             |       |              |         |              |        |              |
| ≥Poverty level (PIR≥1)                    | 1.00  | —           | 1.00  | —            | 1.00    | —            | 1.00   | —            |
| <Poverty level (PIR<1)                    | 2.11  | (1.17–3.79) | 2.57  | (1.03–6.42)  | 1.96**  | (1.46–2.63)  | 2.05** | (1.59–2.65)  |
| Employment                                |       |             |       |              |         |              |        |              |
| Yes                                       | 1.00  | —           | 1.00  | —            | 1.00    | —            | 1.00   | —            |
| No                                        | 2.34  | (1.15–4.76) | 0.41  | (0.16–1.08)  | 1.86*   | (1.30–2.65)  | 1.63*  | (1.21–2.20)  |
| Health care insurance                     |       |             |       |              |         |              |        |              |
| No                                        | 1.00  | —           | 1.00  | —            | 1.00    | —            | 1.00   | —            |
| Yes                                       | 1.04  | (0.54–2.01) | 0.89  | (0.38–2.11)  | 1.39    | (0.99–1.96)  | 1.26   | (0.95–1.68)  |
| Have been heavy alcohol user <sup>a</sup> |       |             |       |              |         |              |        |              |
| No                                        | 1.00  | —           | 1.00  | —            | 1.00    | —            | 1.00   | —            |
| Yes                                       | 1.45  | (0.67–3.16) | 2.56  | (0.58–11.31) | 1.67*   | (1.22–2.30)  | 1.31   | (0.98–1.74)  |
| Having depression <sup>b</sup>            |       |             |       |              |         |              |        |              |
| Not at all                                | 1.00  | —           | 1.00  | —            | 1.00    | —            | 1.00   | —            |
| Yes (mild to severe depression)           | 2.24  | (1.24–4.03) | 1.43  | (0.65–3.13)  | 1.13    | (0.85–1.51)  | 1.35*  | (1.05–1.72)  |
| Any drug user <sup>c</sup>                |       |             |       |              |         |              |        |              |
| No                                        | 1.00  | —           | 1.00  | —            | 1.00    | —            | 1.00   | —            |
| Yes                                       | 3.21  | (1.48–6.95) | 3.29* | (1.35–8.03)  | 14.15** | (7.61–26.33) | 7.65** | (5.04–11.59) |

\*\*<sub>2</sub>, adjusted  $P < 0.01$  \*<sub>1</sub>, adjusted  $P < 0.05$ ; <sup>a</sup> 5<sup>+</sup> (males) or 4<sup>+</sup> (females) drink/day, every day, at any point in the past; <sup>b</sup> Based on having a score 1–4: no depression, and a score of 5–27: mild to severe depression in Patients Health Questionnaire (PHQ-9); <sup>c</sup> Ever use of any drug use including marijuana, hashish, cocaine, heroin, methamphetamine, and injection drugs; OR, odds ratio; CI, confidence interval.
